# Supplementary material for: Development and Validation of a Three-gene Prognostic Signature for Patients with Hepatocellular Carcinoma
Source: PubMed Central journal article supplement (PMC5514049; doi:10.1038/s41598-017-04811-5), 2017-07-17
Supplement: 41598_2017_4811_MOESM2_ESM.pdf [file 41598_2017_4811_MOESM2_ESM.pdf]

## **Development and Validation of a Three-gene Prognostic Signature for Patients with Hepatocellular Carcinoma**

**Binghua Li<sup>1,\*</sup>, Wendu Feng<sup>1,\*</sup>, Ouyang Luo<sup>1</sup>, Tiancheng Xu<sup>1</sup>, Yajuan Cao<sup>1</sup>, Hongyan Wu<sup>2</sup>, Decai Yu<sup>1</sup>& Yitao Ding<sup>1</sup>**

<sup>1</sup>Department of Hepatobiliary Surgery, the Affiliated Drum Tower Hospital, Medical School of Nanjing University, Nanjing, 210093, China

<sup>2</sup>Department of Pathology, the Affiliated Drum Tower Hospital, Medical School of Nanjing University, Nanjing, 210093, China

\*These authors have contributed equally to this work. Correspondence and requests for materials should be addressed to D.C.Y. (email: dryudecai@qq.com) or Y.T.D. (email: drdingyitao@sina.com.cn)

## Supplemental Table s2

Baseline clinicopathological characteristics and relationship between UPB1, SOCS2 and RTN3 expression and clinicopathological parameters of HCC patients from TCGA dataset. Clinical datasheet was downloaded from the TCGA data portal and the characteristics were grouped by UPB1, SOCS2 and RTN3 expression. Patients with unavailable clinicopathological variables were not included in the analysis. The median was used as cutoff value for classification of patients into high or low expression groups. The count data were analyzed with Pearson Chi-Square or Fisher's Exact Test. The quantitative data were analyzed with t-test or Mann-Whitney U test and the ordinal data were analyzed with nonparametric statistics as appropriate. Significance level:  $p < 0.05$ .

| Characteristics     | Patients   | UPB1 expression |        | p value | SOCS2 expression |        | p value | RTN3 expression |        | p value |
|---------------------|------------|-----------------|--------|---------|------------------|--------|---------|-----------------|--------|---------|
|                     |            | Low             | High   |         | Low              | High   |         | Low             | High   |         |
| Age                 |            |                 |        | 0.409   |                  |        | 0.998   |                 |        | 0.14    |
| Mean                | 59.6       | 58.79           | 60.4   |         | 59.56            | 59.64  |         | 60.31           | 58.88  |         |
| SD                  | 13.3       | 13.56           | 12.96  |         | 13.31            | 13.26  |         | 13.58           | 12.95  |         |
| Gender              |            |                 |        | 0.574   |                  |        | 0.736   |                 |        | 0.431   |
| Male                | 243(67.5%) | 119             | 124    |         | 120              | 123    |         | 118             | 125    |         |
| Female              | 117(32.5%) | 61              | 56     |         | 60               | 57     |         | 62              | 55     |         |
| Weight              |            |                 |        | 0.023   |                  |        | 0.313   |                 |        | 0.779   |
| Mean                | 72.8       | 70.99           | 74.61  |         | 71.97            | 73.67  |         | 72.44           | 73.22  |         |
| SD                  | 19.6       | 19.8            | 19.32  |         | 19.58            | 19.67  |         | 18.17           | 20.99  |         |
| Race                |            |                 |        |         |                  |        |         |                 |        |         |
| Asian               | 155(43.1%) | 78              | 77     | 0.522   | 84               | 71     | 0.496   | 71              | 84     | 0.264   |
| White               | 176(48.9%) | 87              | 89     |         | 84               | 82     |         | 95              | 81     |         |
| Other               | 19(5.3%)   | 12              | 7      |         | 10               | 9      |         | 8               | 11     |         |
| Child pugh grade    |            |                 |        | 0.883   |                  |        | 0.511   |                 |        | 0.261   |
| a                   | 211(90.6%) | 92              | 119    |         | 99               | 112    |         | 107             | 104    |         |
| b                   | 21(9.0%)   | 10              | 11     |         | 12               | 9      |         | 14              | 7      |         |
| c                   | 1(0.4%)    | 0               | 1      |         | 0                | 1      |         | 0               | 1      |         |
| Tumor weight        |            |                 |        | 0.0001  |                  |        | 0.337   |                 |        | 0.843   |
| Mean                | 271.5      | 330.89          | 212.17 |         | 271.5            | 271.56 |         | 286.89          | 256.17 |         |
| SD                  | 346.5      | 386.11          | 290.95 |         | 338.25           | 355.53 |         | 386.14          | 303.06 |         |
| Vital status        |            |                 |        | 0.001   |                  |        | 0.0001  |                 |        | 0.006   |
| Alive               | 231(64.2%) | 101             | 130    |         | 98               | 133    |         | 128             | 103    |         |
| Dead                | 129(35.8%) | 79              | 50     |         | 82               | 47     |         | 52              | 77     |         |
| Alcohol consumption |            |                 |        | 0.194   |                  |        | 0.402   |                 |        | 0.493   |
| No                  | 226(66.3%) | 107             | 119    |         | 111              | 115    |         | 115             | 111    |         |
| Yes                 | 115(33.7%) | 63              | 52     |         | 62               | 53     |         | 54              | 61     |         |
| Viral hepatitis     |            |                 |        | 0.44    |                  |        | 0.144   |                 |        | 0.815   |
| No                  | 230(67.4%) | 118             | 112    |         | 123              | 107    |         | 115             | 115    |         |
| Yes                 | 111(32.6%) | 52              | 59     |         | 50               | 61     |         | 54              | 57     |         |
| Histologic grade    |            |                 |        | 0.0001  |                  |        | 0.0001  |                 |        | 0.091   |

|                    |            |     |     |        |     |     |       |     |     |       |
|--------------------|------------|-----|-----|--------|-----|-----|-------|-----|-----|-------|
| G1                 | 53(14.9%)  | 19  | 34  |        | 21  | 32  |       | 27  | 26  |       |
| G2                 | 171(48.2%) | 75  | 96  |        | 75  | 96  |       | 93  | 78  |       |
| G3                 | 120(33.8%) | 77  | 43  |        | 74  | 46  |       | 55  | 65  |       |
| G4                 | 11(3.1%)   | 7   | 4   |        | 8   | 3   |       | 2   | 9   |       |
| Family history     |            |     |     | 0.07   |     |     | 0.046 |     |     | 0.48  |
| No                 | 202(65.0%) | 107 | 95  |        | 111 | 91  |       | 99  | 103 |       |
| Yes                | 109(35.0%) | 46  | 63  |        | 47  | 62  |       | 58  | 51  |       |
| Pathological stage |            |     |     | 0.0001 |     |     | 0.001 |     |     | 0.165 |
| Stage I            | 167(49.7%) | 66  | 101 |        | 70  | 97  |       | 91  | 76  |       |
| Stage II           | 81(24.1%)  | 46  | 35  |        | 42  | 39  |       | 35  | 46  |       |
| Stage III          | 84(25.0%)  | 52  | 32  |        | 55  | 29  |       | 41  | 43  |       |
| Stage IV           | 4(1.2%)    | 3   | 1   |        | 2   | 2   |       | 1   | 3   |       |
| T stage            |            |     |     | 0.0001 |     |     | 0.001 |     |     | 0.22  |
| T1                 | 176(49.3%) | 69  | 107 |        | 75  | 101 |       | 96  | 80  |       |
| T2                 | 89(24.9%)  | 52  | 37  |        | 46  | 43  |       | 36  | 53  |       |
| T3                 | 79(22.1%)  | 49  | 30  |        | 50  | 29  |       | 40  | 39  |       |
| T4                 | 13(3.6%)   | 10  | 3   |        | 9   | 4   |       | 6   | 7   |       |
| Inflammation       |            |     |     | 0.205  |     |     | 0.675 |     |     | 0.06  |
| No                 | 114(50.0%) | 44  | 70  |        | 47  | 67  |       | 59  | 55  |       |
| Mild               | 97(42.5%)  | 48  | 49  |        | 46  | 51  |       | 53  | 44  |       |
| Severe             | 17(7.5%)   | 7   | 10  |        | 6   | 11  |       | 14  | 3   |       |
| Vascular invasion  |            |     |     | 0.051  |     |     | 0.034 |     |     | 0.615 |
| No                 | 200(65.8%) | 88  | 112 |        | 84  | 116 |       | 108 | 92  |       |
| Yes                | 104(34.2%) | 58  | 46  |        | 57  | 47  |       | 53  | 51  |       |

### Supplemental Table s3

Clinical features of 82 HCC patients based on UPB1, SOCS2 and RTN3 expression. The IHC score less than 1 was defined as the low expression group. The count data were analyzed with Pearson Chi-Square or Fisher's Exact Test. The quantitative data were analyzed with t-test or Mann-Whitney U test and the ordinal data were analyzed with nonparametric statistics as appropriate. Significance level:  $p < 0.05$ .

| Characteristics         | Patients  | UPB1 expression |        | p value | SOCS2 expression |        | p value | RTN3 expression |        | p value |
|-------------------------|-----------|-----------------|--------|---------|------------------|--------|---------|-----------------|--------|---------|
|                         |           | Low             | High   |         | Low              | High   |         | Low             | High   |         |
| Gender                  |           |                 |        | 0.132   |                  |        | 0.713   |                 |        | 0.713   |
| Male                    | 74(90.2%) | 43              | 31     |         | 37               | 37     |         | 37              | 37     |         |
| Female                  | 8(9.8%)   | 2               | 6      |         | 5                | 3      |         | 5               | 3      |         |
| Age                     |           |                 |        | 0.255   |                  |        | 0.048   |                 |        | 0.488   |
| Mean                    | 56.37     | 55.11           | 57.89  |         | 58.69            | 53.93  |         | 57.19           | 55.5   |         |
| SD                      | 10.96     | 10.12           | 11.86  |         | 11.82            | 9.52   |         | 11.61           | 10.3   |         |
| Tumor volume            |           |                 |        | 0.819   |                  |        | 0.167   |                 |        | 0.83    |
| Mean                    | 100.59    | 75.64           | 127.56 |         | 118.88           | 79.75  |         | 114.91          | 85.1   |         |
| SD                      | 175.94    | 111.3           | 222.7  |         | 200.37           | 143.16 |         | 211.08          | 128.86 |         |
| Tumor number            |           |                 |        | 0.363   |                  |        | 0.667   |                 |        | 0.602   |
| 1                       | 70(85.4%) | 37              | 33     |         | 35               | 35     |         | 35              | 35     |         |
| 2                       | 5(6.1%)   | 3               | 2      |         | 4                | 1      |         | 3               | 2      |         |
| ≥3                      | 7(8.5%)   | 5               | 2      |         | 3                | 4      |         | 4               | 3      |         |
| Differentiation         |           |                 |        | 0.727   |                  |        | 0.119   |                 |        | 0.747   |
| Well-differentiated     | 5(6.1%)   | 4               | 1      |         | 1                | 4      |         | 3               | 2      |         |
| Moderate-differentiated | 50(61.0%) | 25              | 25     |         | 26               | 24     |         | 23              | 27     |         |
| Poor-differentiated     | 22(26.8%) | 14              | 8      |         | 14               | 8      |         | 12              | 10     |         |
| Tumor capsule invaded   |           |                 |        | 0.019   |                  |        | 0.579   |                 |        | 0.579   |
| No                      | 41(50.0%) | 13              | 27     |         | 19               | 21     |         | 19              | 21     |         |
| Yes                     | 41(50.0%) | 24              | 17     |         | 22               | 19     |         | 22              | 19     |         |
| Micro-vessel invaded    |           |                 |        | 0.892   |                  |        | 0.699   |                 |        | 0.925   |
| No                      | 57(69.5%) | 31              | 26     |         | 30               | 27     |         | 29              | 28     |         |
| Yes                     | 25(30.5%) | 14              | 11     |         | 12               | 13     |         | 13              | 12     |         |
| T stage                 |           |                 |        | 0.543   |                  |        | 0.882   |                 |        | 0.565   |
| T1                      | 36(43.9%) | 19              | 17     |         | 17               | 19     |         | 17              | 19     |         |
| T2                      | 27(32.9%) | 14              | 13     |         | 16               | 11     |         | 14              | 13     |         |
| T3                      | 16(19.5%) | 10              | 6      |         | 9                | 7      |         | 11              | 5      |         |
| T4                      | 3(3.7%)   | 2               | 1      |         | 0                | 3      |         | 0               | 3      |         |
| Pathologic stage        |           |                 |        | 0.698   |                  |        | 0.736   |                 |        | 0.445   |
| Stage I                 | 36(43.9%) | 19              | 17     |         | 17               | 19     |         | 17              | 19     |         |
| Stage II                | 26(31.7%) | 14              | 12     |         | 15               | 11     |         | 13              | 13     |         |
| Stage III               | 17(20.7%) | 22              | 6      |         | 9                | 8      |         | 11              | 6      |         |
| Stage IV                | 3(3.7%)   | 1               | 2      |         | 1                | 2      |         | 1               | 2      |         |
